# Supplementary material for: Effectiveness of Albumin-Fused Thioredoxin against 6-Hydroxydopamine-Induced Neurotoxicity In Vitro
Source: MDPI journal article supplement (doi:10.3390/ijms24119758), 2023-06-05
Supplement: s1 [file s1]

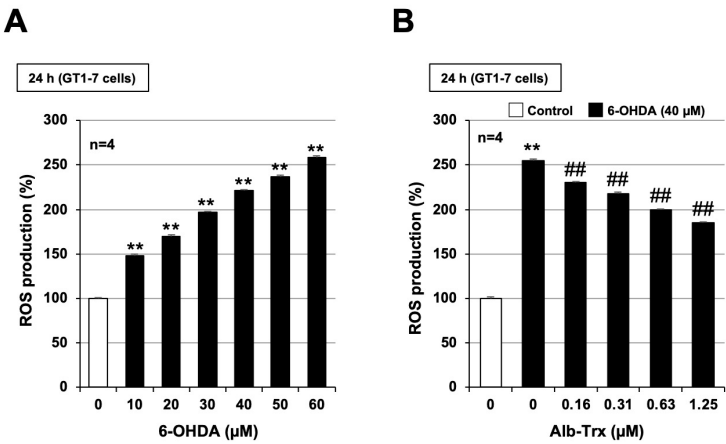

**Supplementary Figure S1. Inhibitory effect of Alb-Trx on ROS production 24 h after 6-OHDA treatment.** GT1-7 cells were treated with H<sub>2</sub>DCFDA (10 μM) for 60 min (A, B). Then, the cells were treated with 6-OHDA (10–60 μM) and cultured for 24 h (A). Cells were pre-treated with Alb-Trx (0.16–1.25 μM) and then incubated in the absence (Control) or presence of 6-OHDA (40 μM) for 24 h (B). The ROS levels were measured using a microplate reader. Values represent the mean ± S.E.M. ( $n = 4$ ). \*\* $P < 0.01$ , vs Control; ## $P < 0.01$ , vs 6-OHDA (40 μM) alone.

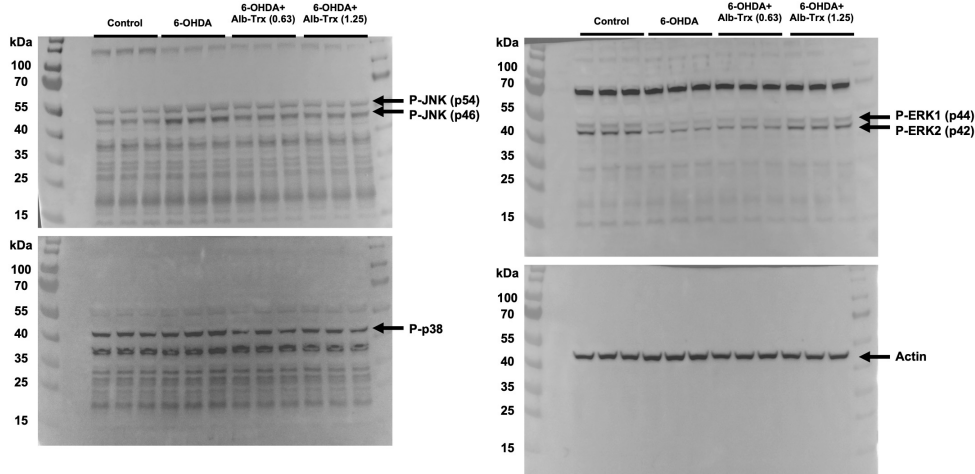

**Supplementary Figure S2. Original images for western blotting analysis (Figure 5).**

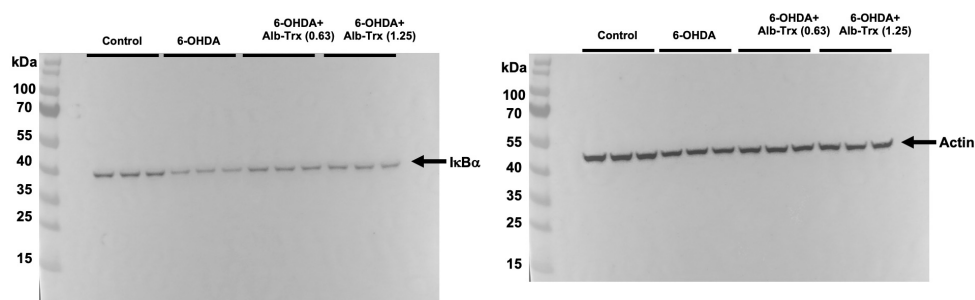

Supplementary Figure S3. Original images for western blotting analysis (Figure 7).

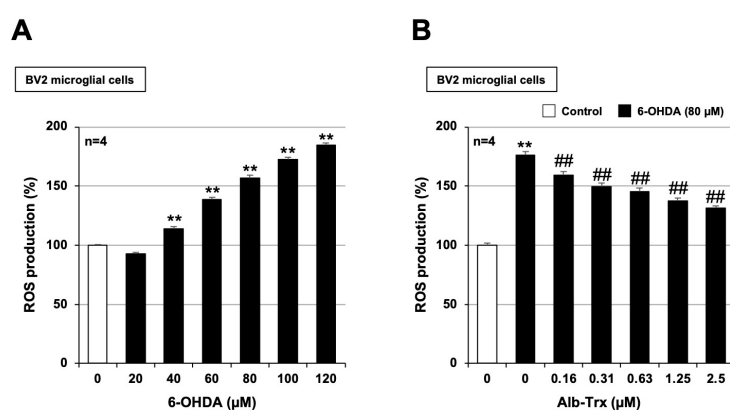

**Supplementary Figure S4. Alb-Trx inhibits 6-OHDA-induced ROS production in BV2 microglial cells.** BV-2 cells were treated with H<sub>2</sub>DCFDA (10 μM) for 60 min (A, B). Then, the cells were treated with 6-OHDA (20–120 μM) and cultured for 24 h (A). Cells were pre-treated with Alb-Trx (0.16–2.5 μM) and then incubated in the absence (Control) or presence of 6-OHDA (80 μM) for 24 h (B). The ROS levels were measured using a microplate reader. Values represent the mean ± S.E.M. ( $n = 4$ ). \*\* $P < 0.01$ , vs Control; ## $P < 0.01$ , vs 6-OHDA (40 μM) alone.
